# Supplementary material
Source: Copernicus journal article supplement (doi:10.5194/egusphere-2026-1261)
Supplement: Supplementary file [file egusphere-2026-1261-AC1-supplement.pdf]

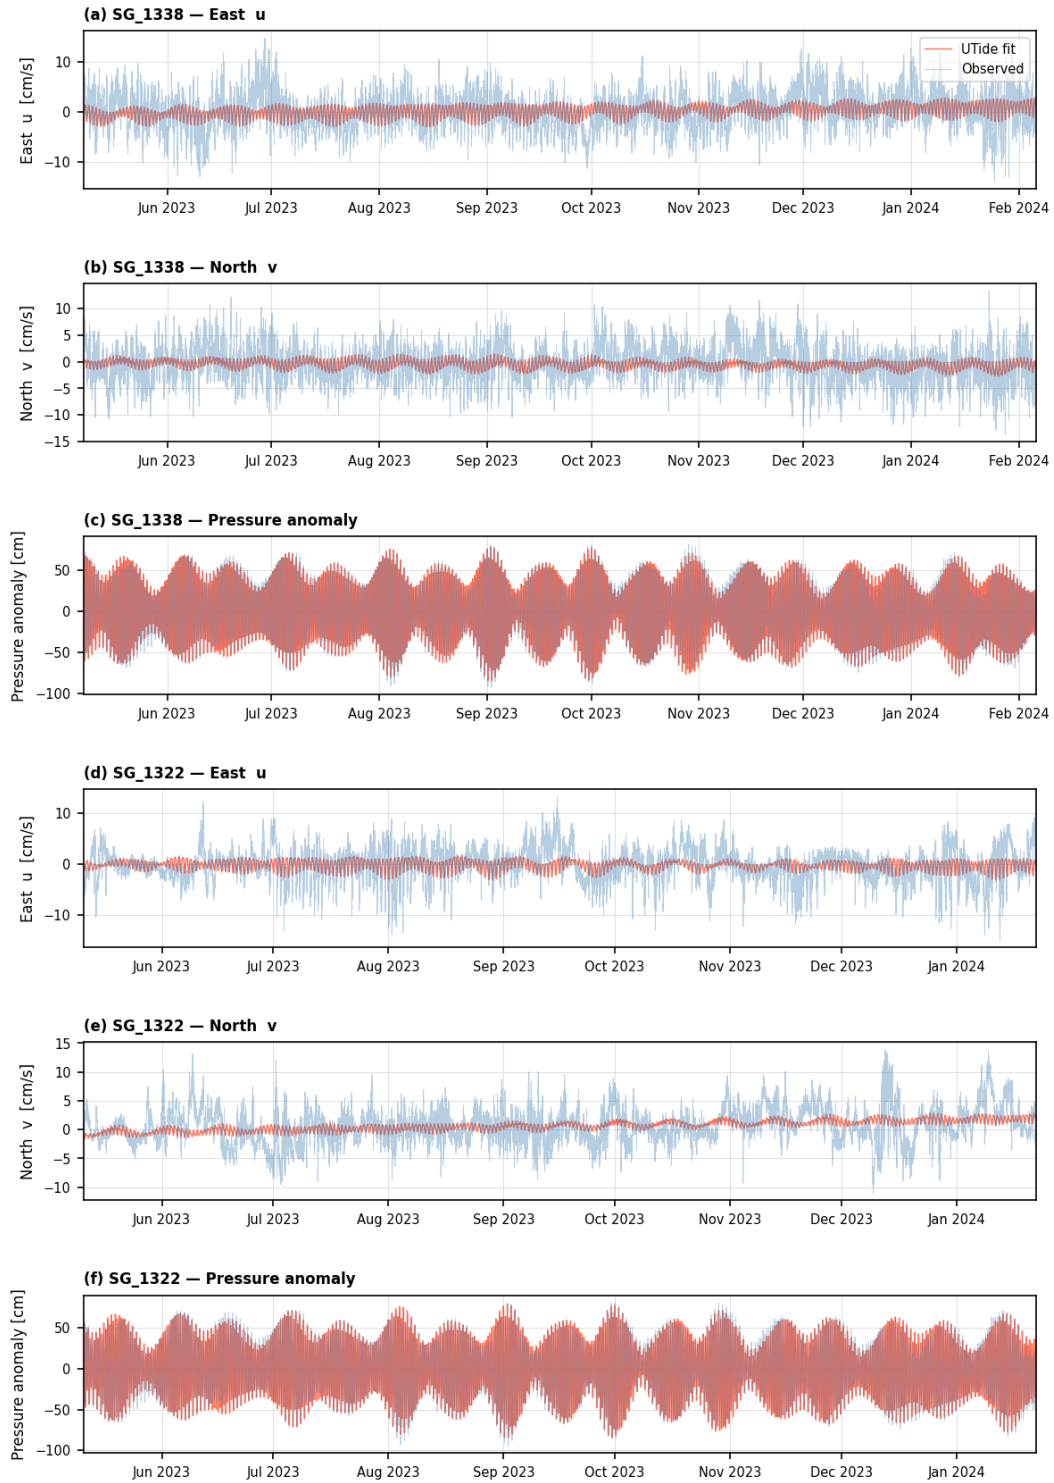

**Figure A** — Complete 8-month time series of east velocity, north velocity, and tidal pressure at SG\_1338 and SG\_1322, with the UTide harmonic fit (13 constituents) overlaid.

SG\_1338 — KE per constituent (total tidal=1.584 total obs=10.997 cm<sup>2</sup>/s<sup>2</sup>)

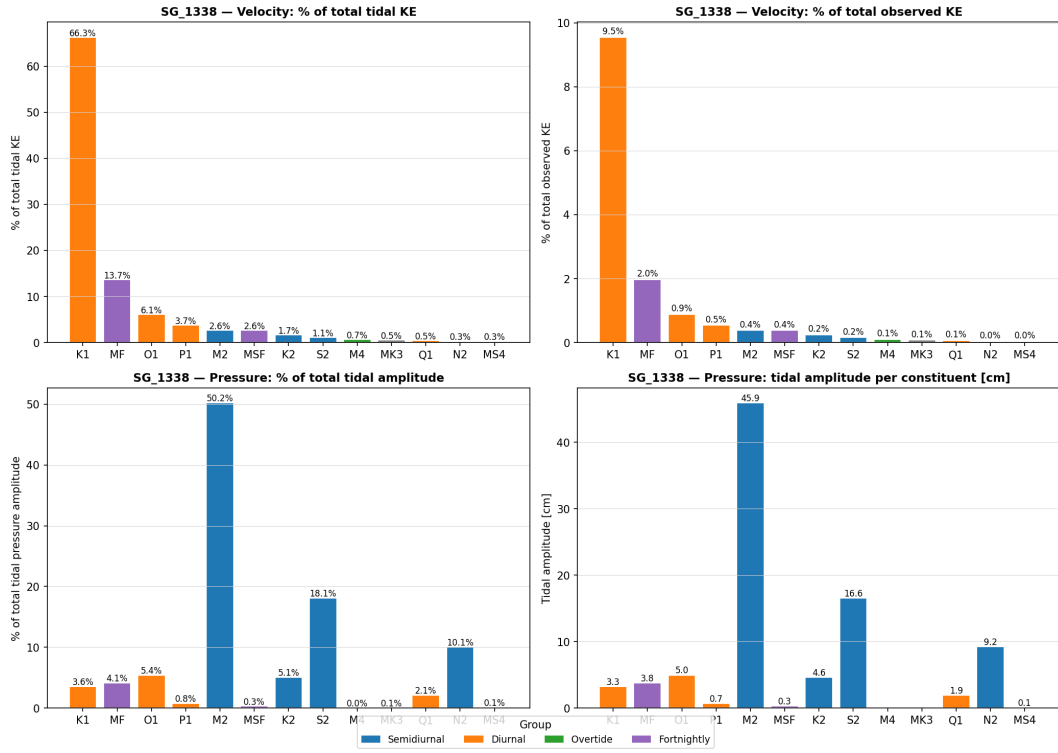

Figure B — Kinetic energy partition per tidal constituent at SG\_1338 (summit, ~1151 m), showing K1 diurnal dominance within the tidal fraction.

SG\_1322 — KE per constituent (total tidal=0.961 total obs=9.309 cm<sup>2</sup>/s<sup>2</sup>)

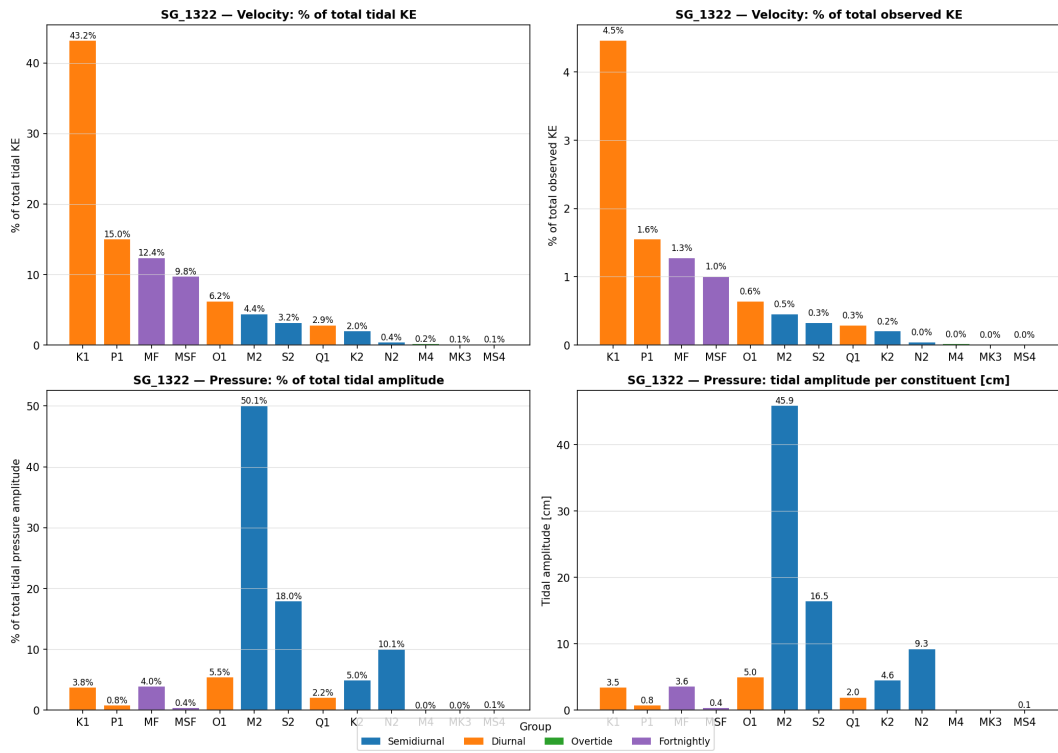

Figure C — Kinetic energy partition per tidal constituent at SG\_1322 (base, ~1758 m).

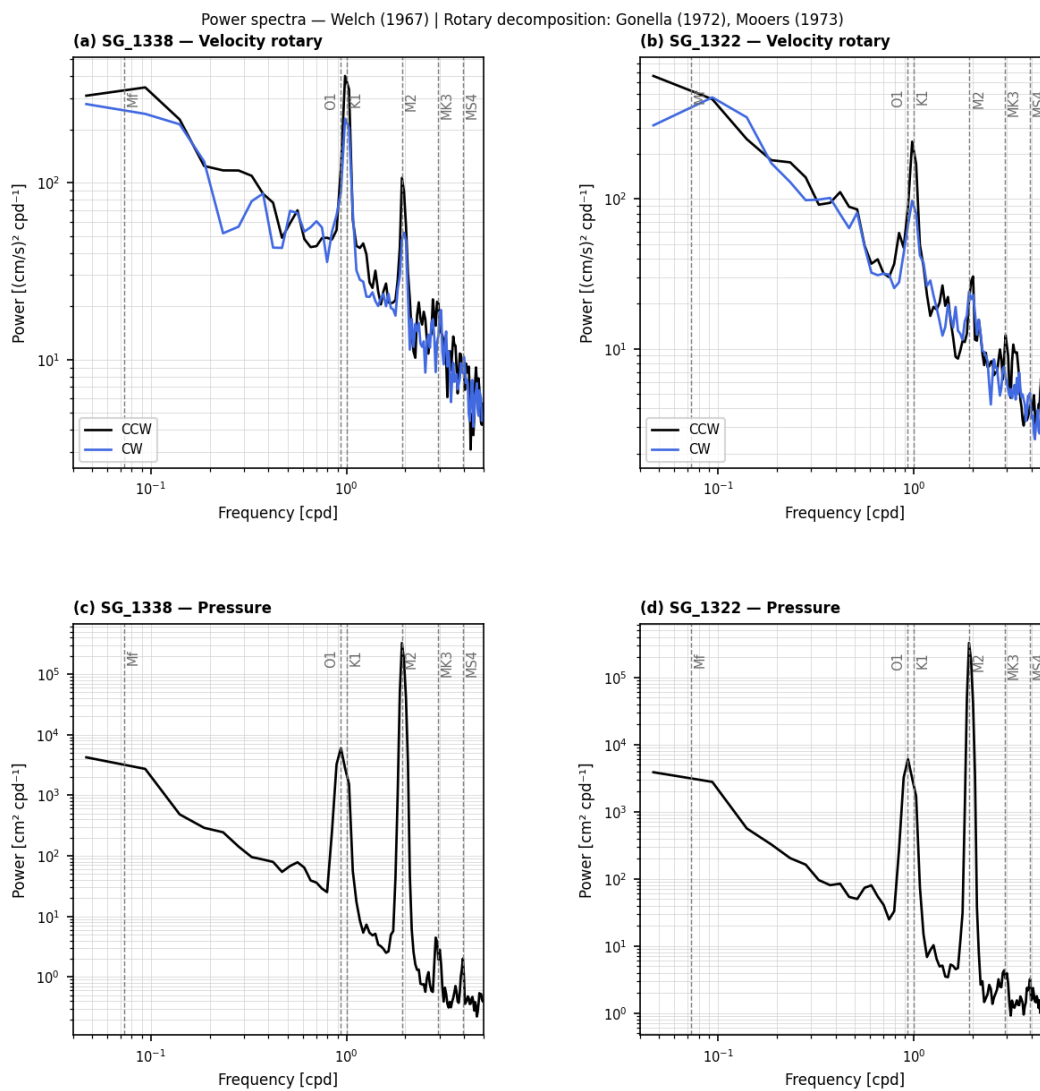

**Figure D** — Rotary power spectra (counter-clockwise in black, clockwise in blue; Welch periodogram) and pressure spectra for both stations. Tidal constituent frequencies are marked. The Mf and K1 peaks dominate the velocity; M2 peak dominates pressure.
